# Supplementary material
Source: PubMed Central journal article supplement (PMC3507255)
Supplement: peds.2012-0918_peds.2012-0918SupplementaryData.pdf [file peds.2012-0918_peds.2012-0918SupplementaryData.pdf]

# Supplemental Information

## ONLINE DATA SUPPLEMENT

### Single *ABCA3* Mutations Increase Risk for Neonatal Respiratory Distress Syndrome

Jennifer A. Wambach, MD, Daniel J. Wegner, MS, Kelcey DePass, BA, Hillary Heins, BS, Todd E. Druley, MD, PhD, Robi D. Mitra, PhD, Ping An, MD, Qunyuan Zhang, PhD, Lawrence M. Nogee, MD, F. Sessions Cole, MD, and Aaron Hamvas, MD

## METHODS

### Referred Infant Cohort

The referred infant cohort consisted of 48 infants ( $\geq 34$  weeks' gestation) referred for evaluation of an extreme respiratory phenotype (prolonged ventilator course and oxygen requirement, need for chronic pulmonary therapies, or death) to 2 of the authors (Drs Hamvas and Cole) from locations outside Washington University Medical Center. Their clinical characteristics are presented in the following table (Supplemental Table 5).

### Next-Generation Sequencing

The goal was to optimize selection of significance thresholds for detection of rare variants in each sequencing run.

We added a polymerase chain reaction–amplified 1934 base pair oligonucleotide from the single-stranded DNA M13mp18 vector backbone with no variation confirmed by using Sanger sequencing, and a 335 base pair, polymerase chain reaction–amplified product of a synthetically engineered pGEM T-Easy DNA vector library containing 15 known insertions, deletions, and substitutions mimicking a range of minor allele frequencies in the minor allele frequencies in the patient DNA pool with a majority of the mutations present at  $<1$  allele per pool. To optimize pool size, the European-descent referred-infant samples were pooled with the European-descent RDS infant samples; similarly, the African-descent referred-infant samples were pooled with the African-descent RDS infant samples.

### Rare Variant Selection and Validation

After aligning the individual raw reads to the annotated reference sequence consisting only of target regions, rare variants were identified with SPLINTER, a computational algorithm to detect rare variants. SPLINTER permits accurate detection and quantification of short

insertions, deletions, and substitutions of up to 4 base pairs. Nonsynonymous variants were characterized as mutations if predicted by using both SIFT and PolyPhen to be “not tolerant” and “damaging,” respectively. We also included 2 mutations that had known associations with pediatric respiratory disease (p.R288K [c.863G>A]) and an intronic mutation (c.3863-98 C>T) that results in a 50 amino acid insertion. All rare mutations were subjected to validation by using an independent genotyping strategy. Sequenom assays were initially used for validation of the pools in which the variant was detected. However, some Sequenom assays were unable to be designed for specific variants or could not be multiplexed efficiently. For these variants, as well as those that could not be reliably evaluated with the data obtained from the Sequenom assay, we designed a TaqMan assay. However, some TaqMan assays were unable to be designed for specific variants and were then validated by using Sanger resequencing. The following tables summarize the discovery and validation process for the disease-based and population-based cohorts.

**SUPPLEMENTAL TABLE 5** Clinical Characteristics of Infants Referred for Extreme RDS Phenotype

|                                    |                |
|------------------------------------|----------------|
| Race                               |                |
| African descent                    | 8 (0.17)       |
| European descent                   | 40 (0.83)      |
| Gender                             |                |
| Female                             | 19 (0.40)      |
| Male                               | 29 (0.60)      |
| Birth weight, mean $\pm$ SD, kg    | 3.2 $\pm$ 0.5  |
| Gestational age, mean $\pm$ SD, wk | 38.2 $\pm$ 2.2 |
| Route of delivery                  |                |
| Vaginal                            | 19 (0.39)      |
| Cesarean                           | 18 (0.38)      |
| Unknown                            | 11 (0.23)      |

**SUPPLEMENTAL TABLE 6** Next-Generation Sequencing Primers

| Gene          | Exon                      | Forward Primer                 | Reverse Primer              |
|---------------|---------------------------|--------------------------------|-----------------------------|
| <i>CHPT1</i>  | 1a                        | CTGTGTTCTCACACGAAAACCCCA       | CTGGGGCAGGGAGAGGTGGA        |
|               | 1b                        | GGTAGTCCAGCCCGCAGTC            | GGGATAGTGGCGTACAGTCTCCAG    |
|               | 2+3                       | CATTGTGGACTTCTGTGACCCTTACC     | GGTGTAGCATTATGAGTACTCGACGA  |
|               | 4                         | CCCTCTGCATATACCGTTACCTATGTGTGA | GGGAAATGAGGTTGTCTTCTATGTGGC |
|               | 5                         | CCCCCTCACTACTGTACTTGGCTAGTCT   | CCTTCCCATTCTGAACTTTGGCA     |
|               | 6                         | CACCCTCAGGTTCTATGAAACCTTGGAA   | CCTTCTCAAATTCACAACCTGGGTAGC |
|               | 7                         | GCTACCCAGTTGTGAATTTGAGAAGG     | TGAGTACCACGCCTGGCCTAGACT    |
|               | 8                         | TCCAGAGGACTACAGTGAGGTCCAA      | TGATGATACAATGGGGCTTCA       |
|               | 9                         | CCTTCTATACTTGGTTTTCTACCTTTGGG  | TTCCATGAAACAGCAGCAGCAAGAG   |
| <i>LPCAT1</i> | 1                         | GCGGGAGGCGAGGCTTCCA            | CCTCCCTGGCCCAGCATC          |
|               | 2                         | GCTGCCTGGTGCTACATGGATTC        | GAAGGGAAGGACAGATGGGCTAGGG   |
|               | 3                         | AGGAAGCCCGTGGCCTGGAC           | TTCTCAGCAGCAGGGGATCTCTCAC   |
|               | 4                         | GTGCTGTTCCCGTCCCTCAGTCAG       | AGGAAGGGCCCCAGTTTCTTCTCC    |
|               | 5                         | GAGCGGAAATCAGTGTGTGCTTCCA      | CCTCTAAGAACCCAGCACACAGGA    |
|               | 6                         | ATAGTCCAGGCATGGAGTGCCTTG       | GGCGCAGATAAAGGGTGTGGAGAGA   |
|               | 7                         | TGGAGCTTAGCACCCCTCCTCCTT       | CTAACGGGTGTCCACACCTGCTTT    |
|               | 8                         | GGAGGTTTACCCAGAATTGGGAG        | TCTGCATCAACCACTGTGAAGAGCG   |
|               | 9                         | GGTGTGCTGAGGTGAGGCTTTGT        | AGCACTCTGGGAGACACCCCTGACT   |
|               | 10                        | ATGAATGTGACTGCCCCACCAAC        | CGGCATCAGGGTCTAGCTAATGC     |
|               | 11                        | CGCACCTTCCAATTAGGAGAATGCCT     | TCAAAAAGCAGGAGGTTTTGCCGAC   |
|               | 12                        | CAGATGTCCCGAGTGAGAGTGGGA       | TGAACAATGGTGTGACGTGACTGC    |
|               | 13                        | ATGGCTCCACATGGAAGTTCGAGTC      | CACGGAGACTCGCCCACTCT        |
|               | 14                        | CACCAGGGCCGTGGGAAAAGAG         | CCTGGAACCTGGGCTGAAGACAGTG   |
| <i>PCYT1B</i> | 1                         | GGGTGGAGGGTAGAGGGAGAAAAA       | GGATTAGGCGGTAGCGCTCTTCTCATT |
|               | 2                         | CTTCAGAGGAAGTTAGTGCCAAAGGA     | GCCCGGCCCTTCTGATACTTTA      |
|               | 3                         | TGGGATTCCTCATTCTGCAGTCTGT      | GGCAGTGAACAAGCGAGCCAGTATG   |
|               | 4                         | GGCTGTGCTTCTTTTGTCTGCTGA       | TTTGGGCTTTCGGTAGTCTTGGCTG   |
|               | 5                         | AGACATGCACATCCATCCAGTGGT       | ATACACTGCAGATGTCCAGGGCAG    |
|               | 6                         | CTGAGGGTGAAGAGTCACTTGGGG       | GTGGCATGGTGTCTCAGAGGGTT     |
|               | 7                         | TGCCTTCCATCAACCTAGCCCTTG       | TGCAGTGGATCTGAGATAAGGGGCA   |
|               | 8                         | TGGGCTCAGGAGTTTGGGGTAGTG       | TGGTCCCAGACCTTCCCTTAGCAG    |
| <i>ABCA3</i>  | 1                         | GGGGTGGACCGGGCACCTG            | GCGGCACTCACCGAGCCTG         |
|               | 2                         | CACTCAAACACCTTCCATCTGTCCAA     | CAGGGCTGGGAGAGAAGTCCAGAAA   |
|               | 3                         | CGTGATCTTAACTGGCTGATGGA        | AAGGAACACAGACACTGAACCCAGA   |
|               | 4+5                       | CGTGTTCATTGCGCACCCACACT        | TTTACTCGCAGGCAGGAGGTTT      |
|               | 6                         | CCGCTTTCATCTGCCAGTGACCTG       | TGACTTGCAGGCAGGCAGAGGTTA    |
|               | 7                         | AGGGACCACTCAGTGTGACATCCG       | GGCTGATAACACGAAACCCAAACCGA  |
|               | 8                         | TGAGCTGAAGTCACTGTGCCCC         | ACAGCGCGGTTCTAGAGTGTGGG     |
|               | 9                         | CTGCTGGGACAGTCGGACTCAGG        | CACCGAGAGGAGTGGGACATTGACA   |
|               | 10                        | GGCCCTCTTGGGAAGAACTTTGTG       | CGCTGACTTTCCTCCTCCAGTCCA    |
|               | 11                        | GTGCTGGAGCTGTGTCCCGTGTAG       | ACAGGCTGGACAAGGCAAACTCA     |
|               | 12                        | GGGCCACTTCTGTGATGTCTTCC        | GGTACTGGGACACCTCTGCACTCA    |
|               | 13+14                     | TTCTCCACAGCAGTGCCCTGAAAGTC     | CTGGCGCTGAGATGGTGTAAAGGG    |
|               | 15                        | GTGTCGTGGGTTTCTCCTCCCTGAC      | GAGCACATCAGTGGAAACACCCCTG   |
|               | 16                        | ATCTCCCTGCGTCCCTGTCTGTT        | GGCTTGAGTCTCCAAGGATGGTGA    |
|               | 17                        | GACAAGGCCATCACCATCCTTGGAG      | CTAGAAAAGGCCACCCCTGCCTGAT   |
|               | 18                        | CTGGGGATCAGCCAAAGATCTCAC       | CCATGGGGATCCCATCTGGATGTA    |
|               | 19                        | ACTGTGCTGGCCGAGGGG             | AGCCAGTCTAGGTGGACGGAAT      |
|               | 20                        | TGCTCCCTCAGTGCCTTAACCAT        | CTGCATGGGCTTACATGAGGCGTTT   |
|               | 21                        | AGAGTCTGCACAGGTGACCCTGCC       | GGCGAACTCTGGCTGCAGGACT      |
|               | 22                        | CCGGTTCCTGACTGGCATTCAAAGT      | TTGGGAGGGCAGACACAATGCTCTA   |
| 23            | GTGCTCGGTCCTGACCTTCTCTGT  | ACCTCTCTGTCCAGTTTCCCTC         |                             |
| 24            | AGGGGTCTGAGGACCTCCAATGCT  | CAGAGGGGCTGGTGAAGCATGAAT       |                             |
| 25            | CCCTCACTCCACACAGCAGGATAA  | AAGGCGGTACAGAGGAACGCACCAG      |                             |
| 26            | TCGAGAGGCAGCTGTGACCTACTGG | CTGAGGCCGTACAGTGGGAGACCAT      |                             |
| 27+28         | CATGCGGTCTTTGTCCTGGTCAATC | CTTGTCTCGCTGTCAGAGGCATGT       |                             |
| 29            | TGTGTCCTGTTCCAAGAGCTTCCA  | GAGCGGTCACTCCAGCTCTATGCT       |                             |
| 30            | TTCCAGGTGCACACAGCTCCTT    | CTCTGCACCAGATGCTGATGGGTCT      |                             |
| 31+32         | ATCAGGAACAGCCTGATCGGAGAGC | AAAACCCCAACACAGCAGTATCA        |                             |
| 33a           | CCCTATTGCCAGAGGACTCCAGGT  | TCACAGTCAGCAGCTTCCCTCACT       |                             |
| 33b           | CTGAGCTGGGGTTGAATTTCTCCA  | GCGTTGATCAGCCGGCTTTTCTCT       |                             |
| <i>SFTPC</i>  | 1                         | TGGGAGGAGGCAAGGTAAGGGAAAG      | GGGTCCCTGGCTTAGTGGTCTTGGT   |

**SUPPLEMENTAL TABLE 6** Continued

| Gene | Exon | Forward Primer            | Reverse Primer            |
|------|------|---------------------------|---------------------------|
|      | 2    | GACAGCCCTGAGTCAGAAGCCATGA | GCCTCTTTCCTTCTAGCTGTGCCCC |
|      | 3+4  | CAACCCAGCTCAGGCTTTCCACAA  | AGTCGTGCAGGGGAATAGGAGAGGG |
|      | 5    | CCGAATGGTGGCTATTGTACACCTG | GATGACCCCGCTTCAGTGGACG    |
|      | 6    | CGGTACTCCCACTCCCTGATTCTC  | GCCCTGCAGGAAGACAGAAGCAGAC |

**SUPPLEMENTAL TABLE 7** European-Descent Disease-Based Cohort: Rare Variant Discovery and Validation

| Gene          | Synonymous Variants | Nonsynonymous Variants | Predicted Deleterious by SIFT or PolyPhen | Predicted Deleterious by SIFT and PolyPhen | Assay Design Failed | Confirmed by Independent Strategy |
|---------------|---------------------|------------------------|-------------------------------------------|--------------------------------------------|---------------------|-----------------------------------|
| <i>SFTPC</i>  | 1                   | 3                      | 0                                         | 1                                          | 0                   | 0                                 |
| <i>ABCA3</i>  | 13                  | 36                     | 6                                         | 14                                         | 0                   | 9                                 |
| <i>CHPT1</i>  | 1                   | 0                      | NA                                        | NA                                         | NA                  | NA                                |
| <i>LPCAT</i>  | 6                   | 7                      | 4                                         | 2                                          | 0                   | 0                                 |
| <i>PCYT1B</i> | 2                   | 3                      | 2                                         | 0                                          | 0                   | 0                                 |

**SUPPLEMENTAL TABLE 8** European-Descent Population-Based Cohort: Rare Variant Discovery and Validation

| Gene          | Synonymous Variants | Nonsynonymous Variants | Predicted Deleterious by SIFT or PolyPhen | Predicted Deleterious by SIFT and PolyPhen | Assay Design Failed | Confirmed by Independent Strategy |
|---------------|---------------------|------------------------|-------------------------------------------|--------------------------------------------|---------------------|-----------------------------------|
| <i>SFTPC</i>  | 6                   | 8                      | 4                                         | 1                                          | 1                   | 1                                 |
| <i>ABCA3</i>  | 23                  | 52                     | 19                                        | 15                                         | 1                   | 8                                 |
| <i>CHPT1</i>  | 4                   | 8                      | 0                                         | 1                                          | NA                  | NA                                |
| <i>LPCAT</i>  | 7                   | 14                     | 3                                         | 4                                          | 2                   | 1                                 |
| <i>PCYT1B</i> | 4                   | 5                      | 0                                         | 4                                          | NA                  | NA                                |

**SUPPLEMENTAL TABLE 9** African-Descent Disease-Based Cohort: Rare Variant Discovery and Validation

| Gene          | Synonymous Variants | Nonsynonymous Variants | Predicted Deleterious by SIFT or PolyPhen | Predicted Deleterious by SIFT and PolyPhen | Assay Design Failed | Confirmed by Independent Strategy |
|---------------|---------------------|------------------------|-------------------------------------------|--------------------------------------------|---------------------|-----------------------------------|
| <i>SFTPC</i>  | 1                   | 4                      | 1                                         | 2                                          | 0                   | 0                                 |
| <i>ABCA3</i>  | 8                   | 34                     | 9                                         | 7                                          | 0                   | 3                                 |
| <i>CHPT1</i>  | 0                   | 0                      | NA                                        | NA                                         | NA                  | NA                                |
| <i>LPCAT</i>  | 9                   | 13                     | 5                                         | 1                                          | 1                   | 0                                 |
| <i>PCYT1B</i> | 1                   | 4                      | 3                                         | 0                                          | NA                  | NA                                |

**SUPPLEMENTAL TABLE 10** African-Descent Population-Based Cohort: Rare Variant Discovery and Validation

| Gene          | Synonymous Variants | Nonsynonymous Variants | Predicted Deleterious by SIFT or PolyPhen | Predicted Deleterious by SIFT and PolyPhen | Assay Design Failed | Confirmed by Independent Strategy |
|---------------|---------------------|------------------------|-------------------------------------------|--------------------------------------------|---------------------|-----------------------------------|
| <i>SFTPC</i>  | 1                   | 2                      | 1                                         | 0                                          | NA                  | NA                                |
| <i>ABCA3</i>  | 12                  | 17                     | 1                                         | 5                                          | 0                   | 2                                 |
| <i>CHPT1</i>  | 0                   | 0                      | NA                                        | NA                                         | NA                  | NA                                |
| <i>LPCAT</i>  | 6                   | 8                      | 2                                         | 1                                          | 0                   | 0                                 |
| <i>PCYT1B</i> | 0                   | 2                      | 0                                         | 0                                          | NA                  | NA                                |

**SUPPLEMENTAL TABLE 11** Estimated Gestational Age and Birth Weight Among European-Descent Infants With and Without *ABCA3* Mutations

| <i>ABCA3</i> Mutation                    | European Descent, RDS       |                            |                | European Descent, Non-RDS  |                             |                |
|------------------------------------------|-----------------------------|----------------------------|----------------|----------------------------|-----------------------------|----------------|
|                                          | Present<br>( <i>n</i> = 16) | Absent<br>( <i>n</i> = 96) | <i>P</i> Value | Present<br>( <i>n</i> = 6) | Absent<br>( <i>n</i> = 155) | <i>P</i> Value |
| Estimated gestational age, mean ± SD, wk | 37.6 ± 1.7                  | 36.8 ± 1.7                 | .12            | 38.3 ± 2.1                 | 38.2 ± 1.5                  | .92            |
| Birth weight mean ± SD, kg               | 3.0 ± 0.6                   | 3.1 ± 0.6                  | .75            | 3.3 ± 0.7                  | 3.1 ± 0.7                   | .49            |

**SUPPLEMENTAL TABLE 12** Disease Severity Measurements Among European-Descent RDS Infants With and Without *ABCA3* Mutations

| <i>ABCA3</i> Mutation              | Present ( <i>n</i> = 16) | Absent ( <i>n</i> = 96) | <i>P</i> Value |
|------------------------------------|--------------------------|-------------------------|----------------|
| Ventilation duration, mean ± SD, d | 10.2 ± 11                | 10.5 ± 15               | .93            |
| Oxygen duration, mean ± SD, d      | 17.1 ± 16                | 17.4 ± 22               | .95            |
| Pneumothorax, <i>n</i> (%)         | 4 (0.25)                 | 32 (0.33)               | .58            |
| ECMO, <i>n</i> (%)                 | 1 (0.06)                 | 5 (0.05)                | 1.0            |
| Home oxygen, <i>n</i> (%)          | 2 (0.13)                 | 10 (0.10)               | .68            |
| Death, <i>n</i> (%)                | 0                        | 7 (0.07)                | .59            |

ECMO, extracorporeal membrane oxygenation.

**SUPPLEMENTAL TABLE 13** Validated Rare Mutations Among Referred Infants

| Gene                               | Variant      | European Descent, Referred<br>RDS ( <i>n</i> = 40) | African Descent, Referred<br>RDS ( <i>n</i> = 8) |
|------------------------------------|--------------|----------------------------------------------------|--------------------------------------------------|
| <i>ABCA3</i>                       | L212M        | 1                                                  | 0                                                |
|                                    | R280C        | 0                                                  | 1                                                |
|                                    | R280H        | 1                                                  | 0                                                |
|                                    | R288K        | 1                                                  | 0                                                |
|                                    | E292V        | 3 <sup>a</sup>                                     | 0                                                |
|                                    | G378R        | 1                                                  | 0                                                |
|                                    | P933L        | 1 <sup>a</sup>                                     | 0                                                |
|                                    | E1364K       | 1                                                  | 0                                                |
|                                    | c.3863-98C>T | 3                                                  | 0                                                |
| Infants with variant, <i>n</i> (%) | 11 (27.5)    | 1 (12.5)                                           |                                                  |

<sup>a</sup> Includes 1 compound heterozygous individual (p.E292V, p.P933L).
